# Supplementary material
Source: MDPI journal article supplement (https://www.mdpi.com/search?q=fermentation-06-00043)
Supplement: s001 [file fermentation-06-00043-s001.pdf]

**Table S1.** Chemical profiles of inoculated (A, B, and C) and spontaneously fermented (M) wines at the end of alcoholic fermentation. Data are means  $\pm$  standard deviations of duplicated samples.

| Parameters                   | Experimental Wines |                   |                   |                   |
|------------------------------|--------------------|-------------------|-------------------|-------------------|
|                              | A                  | B                 | C                 | M                 |
| Ethanol production (g/L)     | 13.12 $\pm$ 0.04   | 12.93 $\pm$ 0.27  | 12.80 $\pm$ 0.10  | 13.10 $\pm$ 0.00  |
| Free SO <sub>2</sub> (mg/L)  | 3.30 $\pm$ 0.00    | 3.30 $\pm$ 0.00   | 3.20 $\pm$ 0.00   | 3.30 $\pm$ 0.00   |
| Total SO <sub>2</sub> (mg/L) | 12.65 $\pm$ 0.35   | 11 $\pm$ 1.41     | 14.00 $\pm$ 0.00  | 13.50 $\pm$ 0.71  |
| Total acidity (g/L)          | 4.45 $\pm$ 0.07    | 4.65 $\pm$ 0.07   | 4.75 $\pm$ 0.07   | 4.65 $\pm$ 0.07   |
| Volatile acidity (g/L)       | 0.30 $\pm$ 0.00    | 0.30 $\pm$ 0.00   | 0.40 $\pm$ 0.00   | 0.35 $\pm$ 0.07   |
| pH                           | 3.12 $\pm$ 0.01    | 3.10 $\pm$ 0.01   | 3.09 $\pm$ 0.00   | 3.11 $\pm$ 0.02   |
| Malic acid (g/L)             | 1.90 $\pm$ 0.00    | 1.90 $\pm$ 0.00   | 2.00 $\pm$ 0.00   | 1.90 $\pm$ 0.00   |
| Reducing sugar (g/L)         | 3.50 $\pm$ 0.00    | 3.40 $\pm$ 0.00   | 2.3 $\pm$ 0.28    | 2.96 $\pm$ 0.08   |
| citric acid (g/L)            | 0.36 $\pm$ 0.01    | 0.37 $\pm$ 0.00   | 0.39 $\pm$ 0.02   | 0.37 $\pm$ 0.00   |
| Glucose + Fructose (g/L)     | 4.70 $\pm$ 0.00    | 3.80 $\pm$ 0.00   | 4.70 $\pm$ 0.14   | 4.25 $\pm$ 0.07   |
| Glycerol (g/L)               | 6.80 $\pm$ 0.00    | 6.90 $\pm$ 0.00   | 6.89 $\pm$ 0.00   | 7.00 $\pm$ 0.00   |
| Tartaric acid (g/L)          | 3.00 $\pm$ 0.00    | 2.90 $\pm$ 0.00   | 2.80 $\pm$ 0.00   | 3.02 $\pm$ 0.00   |
| CO <sub>2</sub> (mg/L)       | 371.04 $\pm$ 2.02  | 418.75 $\pm$ 6.89 | 408.49 $\pm$ 1.22 | 362.30 $\pm$ 2.84 |
